# Supplementary material for: Secondary Teacher Candidates’ Mathematical Modeling Task Design and Revision
Source: MDPI journal article supplement (doi:10.3390/math9222933), 2021-11-17
Supplement: s1 [file s1]

Archive with 5 entries (5 files):
- Appendix 1.pdf
- Appendix 2.pdf
- Appendix 3.pdf
- Appendix 4.pdf
- Appendix 5.pdf
