# Supplementary material for: Secondary Teacher Candidates’ Mathematical Modeling Task Design and Revision
Source: MDPI journal article supplement (doi:10.3390/math9222933), 2021-11-17
Supplement: s1 [file s1 › Appendix 5.pdf]

## Appendix 5. Uses of DRS in revising rubric: The case of group 1

Step 1: N strategy in table 4 changes the unknown for the amount of change in the time interval from  $t$  to  $a$  in the revised rubric.

|       | score | criteria in the original rubric of (1)                                                                                                                                               |
|-------|-------|--------------------------------------------------------------------------------------------------------------------------------------------------------------------------------------|
| (1)   | 0     | In case of a blank or meaningless statement                                                                                                                                          |
|       | 1     | In case that $h(x) = at^3 + bt^2 + ct + d$ is denoted                                                                                                                                |
|       | 2     | In the case of establishing a system of four equations by substituting $h(0)$                                                                                                        |
|       | 3     | In the case of where $h(t)$ was not found correctly because $a, b, c, d$ was obtained incorrectly due to a calculation mistake in the process of performing the system of equations. |
|       | 4     | When the system of equation is solved correctly without calculation errors and $h(t)$ is obtained correctly.                                                                         |
|       | score | criteria in the revised rubric of [1-1]                                                                                                                                              |
| [1-1] | 0     | A blank or meaningless statement                                                                                                                                                     |
|       | 1     | $h(x) = ax^3 + bx^2 + cx + d$ is denoted                                                                                                                                             |
|       | 2     | A system of three equations is provided<br>$a + b + c + d = 80$ $3a + 2b + c = 80$ $64a + 16b + 4c + d = 140$                                                                        |
|       | 3     | A system of four equations by substituting $h(0) = 0$ is provided                                                                                                                    |
|       | 4     | $h(t)$ was not found correctly; $a, b, c, d$ was obtained incorrectly due to calculation errors                                                                                      |
|       | 5     | The system of equation is solved correctly without calculation errors; and $h(x) = -5x^3 + 10x^2 + 75x$ is provided                                                                  |

Step 2: W strategy in table 5 changes contents related to the time interval and the range of  $a$  from the original rubric of (2) to the revised rubric of [1-2].

|       | score | criteria in the original rubric of (2)                                                                                                                                                                         |
|-------|-------|----------------------------------------------------------------------------------------------------------------------------------------------------------------------------------------------------------------|
| (2)   | 0     | In case of a blank or meaningless statement                                                                                                                                                                    |
|       | 2     | When only mathematical meanings such as instantaneous rate of change are described                                                                                                                             |
|       | 4     | In the case of correlating revenue with mathematical meaning, such as the instantaneous rate of change of revenue when the time interval is 11 minutes                                                         |
|       | score | criteria in the revised rubric of [1-2]                                                                                                                                                                        |
| [1-2] | 0     | A blank or unclear statement or incorrect descriptions                                                                                                                                                         |
|       | 2     | The profit increases is mentioned but the mathematical meaning i.e., "when the time interval becomes larger than $(10 + a)$ minutes, the profit is greater than when it is $(10 + a)$ minutes" is not provided |

|   |                                                                                                                                                                                                                                                                                                               |
|---|---------------------------------------------------------------------------------------------------------------------------------------------------------------------------------------------------------------------------------------------------------------------------------------------------------------|
| 4 | The profit increases is mentioned but the mathematical meaning i.e., “Since ‘ $h'(a) > 0$ , the function of $h(x)$ increases in some interval containing $x = a$ and when the time interval becomes larger than $(10 + a)$ minutes, the profit is greater than when it is $(10 + a)$ minutes” is not provided |
|---|---------------------------------------------------------------------------------------------------------------------------------------------------------------------------------------------------------------------------------------------------------------------------------------------------------------|

Step 3: B strategy in table 7 changes contents related to two separate problems from the original rubric of (4) to two revised rubrics of [2-2] and [2-3].

|     | score | criteria in the original rubric of (4)                                                                                                                                       |
|-----|-------|------------------------------------------------------------------------------------------------------------------------------------------------------------------------------|
| (4) | 0     | In case of a blank or meaningless statement                                                                                                                                  |
|     | 1     | When $g(t)$ and $h(t)$ are factored separately                                                                                                                               |
|     | 2     | If only one of the case where the profit increases and the case of where the profit is maximum is found correctly                                                            |
|     | 3     | If one solved the problem logically but didn't write the exact meaning like $3 < x < 15$ ( $x \neq 10$ ), $x=13$                                                             |
|     | 4     | When the time interval is between 3 and 10 minutes or between 10 and 15 minutes, the profit increases, and when the time interval is 13 minutes, the profit is maximum, etc. |

|       | score | criteria in the revised rubric of [2-2]                                                                                                                     |
|-------|-------|-------------------------------------------------------------------------------------------------------------------------------------------------------------|
| [2-2] | 0     | A blank or unclear statement                                                                                                                                |
|       | 1     | $g(x) = \frac{9}{8}x(x-8)(x+7) > 0$ <u>and</u> the solution of $-7 < x < 0$<br><u>OR</u> $h(x) = -5x(x+3)(x-5) > 0$ <u>and</u> the solution of $0 < x < 5$  |
|       | 2     | $g(x) = \frac{9}{8}x(x-8)(x+7) > 0$ <u>and</u> the solution of $-7 < x < 0$<br><u>AND</u> $h(x) = -5x(x+3)(x-5) > 0$ <u>and</u> the solution of $0 < x < 5$ |
|       | 3     | For each inequality, the range of $x$ is obtained correctly, but the range of the time interval expected to increase the profit is incorrect                |
|       | 4     | The description is accurate, i.e. “when the time interval is between 3 and 10 minutes or between 10 and 15 minutes, the profit increases.”                  |

|       | score | criteria in the revised rubric of [2-3]                                                                                                             |
|-------|-------|-----------------------------------------------------------------------------------------------------------------------------------------------------|
| [2-3] | 0     | A blank or unclear statement                                                                                                                        |
|       | 1     | The change in average revenue has a maximum value when $x = 3$ in the function of $h(x)$ , but the description of the time interval is not clear    |
|       | 2     | The function of $h(x)$ has a maximum value when $x = 3$<br>When the time interval is 13 minutes, the average profit during the rush hour is maximum |
